# Supplementary material for: Distribution of Tick-Borne Pathogens in Domestic Animals and Their Ticks in the Countries of the Mediterranean Basin between 2000 and 2021: A Systematic Review
Source: MDPI journal article supplement (doi:10.3390/microorganisms10061236), 2022-06-16
Supplement: s1 [file s1]

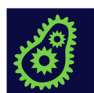

## Supplementary materials

**Table S1.** Positive engorged ticks for TBP collected on domestic animals and their distribution in the Mediterranean Basin.

| Tick genus           | Number of tick species and tick species                                                                                                                                  | Stage                  | Number of countries with data and countries                                                        | Number of tick host species with data and host species              | Number of pathogenic genera/species and pathogens detected in ticks ( <sup>b</sup> bacteria, <sup>p</sup> parasite, <sup>v</sup> virus)                                                                                                                                                                                                                                                                                                                                                                                                                                                                                                                                                                                                                                                                                                                                                                                                                                                                                                                                                                                                                                                                                                                                                                                                                                                                                                                                                                                                                                                                                                                                                                                                                                                                                                                                                                                                                                                                                                                                                                               |
|----------------------|--------------------------------------------------------------------------------------------------------------------------------------------------------------------------|------------------------|----------------------------------------------------------------------------------------------------|---------------------------------------------------------------------|-----------------------------------------------------------------------------------------------------------------------------------------------------------------------------------------------------------------------------------------------------------------------------------------------------------------------------------------------------------------------------------------------------------------------------------------------------------------------------------------------------------------------------------------------------------------------------------------------------------------------------------------------------------------------------------------------------------------------------------------------------------------------------------------------------------------------------------------------------------------------------------------------------------------------------------------------------------------------------------------------------------------------------------------------------------------------------------------------------------------------------------------------------------------------------------------------------------------------------------------------------------------------------------------------------------------------------------------------------------------------------------------------------------------------------------------------------------------------------------------------------------------------------------------------------------------------------------------------------------------------------------------------------------------------------------------------------------------------------------------------------------------------------------------------------------------------------------------------------------------------------------------------------------------------------------------------------------------------------------------------------------------------------------------------------------------------------------------------------------------------|
| <i>Rhipicephalus</i> | <i>Rh. (Bo). annulatus</i> ,<br><i>Rh. appendiculatus</i> ,<br><i>Rh. bursa</i> ,<br><i>Rh. (Bo). microplus</i> ,<br><i>Rh. pusillus</i> ,<br><i>Rh. sanguineus</i> s.l. | Larva, nymph and adult | Algeria, Cyprus, Egypt, France, Greece, Italy, Lebanon, Morocco, Palestine, Spain, Tunisia, Turkey | Buffalo, Cat, Cattle, Dog, Donkey, Goat, Horse and Sheep            | <i>Anaplasma</i> spp. <sup>b</sup> , <i>A. centrale</i> <sup>b</sup> , <i>A. marginale</i> <sup>b</sup> , <i>A. ovis</i> <sup>b</sup> , <i>A. phagocytophilum</i> <sup>b</sup> , <i>A. platys</i> <sup>b</sup> , <i>Babesia</i> spp. <sup>p</sup> , <i>B. bigemina</i> <sup>p</sup> , <i>B. bovis</i> <sup>p</sup> , <i>B. canis</i> <sup>p</sup> , <i>B. capreoli</i> <sup>p</sup> , <i>B. divergens</i> <sup>p</sup> , <i>B. gibsoni</i> <sup>p</sup> , <i>B. microti</i> <sup>p</sup> , <i>B. ovis</i> <sup>p</sup> , <i>B. venatorum</i> <sup>p</sup> , <i>B. vogeli</i> <sup>p</sup> , <i>Bartonella</i> spp. <sup>b</sup> , <i>Ba. caballi</i> <sup>b</sup> , <i>Ba. vinsonii</i> <sup>b</sup> , <i>Ba. vinsonii berkhoffi</i> <sup>b</sup> , <i>Borrelia</i> spp. <sup>b</sup> , <i>Bo. burgdoferi</i> s.l. <sup>b</sup> , <i>Cercopithifilaria baina</i> <sup>p</sup> , <i>Chlamydia abortus</i> <sup>b</sup> , <i>Chlamydomphila psittaci</i> <sup>b</sup> , <i>Coxiella burnetii</i> <sup>b</sup> , Crimean-Congo hemorrhagic fever virus <sup>v</sup> , <i>Ehrlichia</i> spp. <sup>b</sup> , <i>E. canis</i> <sup>b</sup> , <i>E. minacensis</i> <sup>b</sup> , <i>Candidatus E. urmitei</i> <sup>b</sup> , <i>Francisella</i> spp. <sup>b</sup> , <i>Hepatozoon</i> spp. <sup>p</sup> , <i>Hepatozoon canis</i> <sup>p</sup> , <i>Hepatozoon felis</i> , lumpy skin disease virus <sup>v</sup> , <i>Rickettsia</i> spp. <sup>b</sup> , <i>R. conorii</i> <sup>b</sup> , <i>R. conorii israelensis</i> <sup>b</sup> , <i>R. felis</i> <sup>b</sup> , <i>R. massiliae</i> <sup>b</sup> , <i>R. monacensis</i> <sup>b</sup> , <i>R. raoultii</i> <sup>b</sup> , <i>R. rhipicephali</i> <sup>b</sup> , <i>Candidatus Rickettsia goldwasserii</i> <sup>b</sup> , <i>Candidatus R. barbariae</i> , <i>Theileria</i> spp. <sup>p</sup> , <i>Theileria annae</i> <sup>p</sup> , <i>T. annulata</i> <sup>p</sup> , <i>T. buffeli</i> <sup>p</sup> , <i>T. cervi</i> <sup>p</sup> , <i>T. equi</i> <sup>p</sup> , <i>T. orientalis</i> <sup>p</sup> , <i>T. ovis</i> <sup>p</sup> , <i>T. sergenti</i> <sup>p</sup> |
| <i>Ixodes</i>        | <i>I. hexagonus</i> ,<br><i>I. ricinus</i> and <i>I. ventralloi</i>                                                                                                      | Larva, nymph and adult | Algeria, France, Greece, Italy, Morocco, Slovenia, Spain, Turkey                                   | Cat, Cattle, Dog, Goat, Horse and Sheep                             | <i>Anaplasma phagocytophilum</i> <sup>b</sup> , <i>A. platys</i> <sup>b</sup> , <i>Babesia bovis</i> <sup>p</sup> , <i>B. canis</i> <sup>p</sup> , <i>B. capreoli</i> <sup>p</sup> , <i>B. divergens</i> <sup>p</sup> , <i>B. gibsoni</i> <sup>p</sup> , <i>B. microti</i> <sup>p</sup> , <i>B. ovis</i> <sup>p</sup> , <i>B. venatorum</i> <sup>p</sup> , <i>B. vogeli</i> <sup>p</sup> , <i>Bartonella henselae</i> <sup>b</sup> , <i>Borrelia</i> spp. <sup>b</sup> , <i>Bo. afzelii</i> <sup>b</sup> , <i>Bo. burgdoferi</i> s.l. <sup>b</sup> , <i>Bo. garinii</i> <sup>b</sup> , <i>Bo. valaisiana</i> <sup>b</sup> , <i>Chlamydia abortus</i> <sup>b</sup> , <i>Chlamydomphila psittaci</i> <sup>b</sup> , <i>Coxiella burnetii</i> <sup>b</sup> , Crimean-Congo hemorrhagic fever virus <sup>v</sup> , <i>Ehrlichia</i> spp. <sup>b</sup> , <i>E. canis</i> <sup>b</sup> , <i>Noehrlichia mikurensis</i> <sup>b</sup> , <i>Hepatozoon canis</i> <sup>p</sup> , <i>Rickettsia</i> spp. <sup>b</sup> , <i>R. helvetica</i> <sup>b</sup> , <i>R. monacensis</i> <sup>b</sup> , <i>R. raoultii</i> <sup>b</sup> , <i>Theileria annae</i> <sup>p</sup> , <i>T. buffeli</i> <sup>p</sup> , <i>T. cervi</i> <sup>p</sup> , <i>T. equi</i> <sup>p</sup> , <i>T. orientalis</i> <sup>p</sup> , <i>T. ovis</i> <sup>p</sup> , <i>T. sergenti</i> <sup>p</sup> , Tick-borne encephalitis virus <sup>v</sup>                                                                                                                                                                                                                                                                                                                                                                                                                                                                                                                                                                                                                                                                                                              |
| <i>Hyalomma</i>      | <i>Hy. aegyptium</i> ,<br><i>Hy. anatolicum</i> ,<br><i>Hy. deritum</i> ,<br><i>Hy. dromedarii</i> ,<br><i>Hy. excavatum</i> ,<br><i>Hy. impeltatum</i> ,<br><i>Hy.</i>  | Larva, nymph and adult | Algeria, Cyprus, Egypt, France, Greece, Israel, Italy, Lebanon, Palestine, Spain, Tunisia, Turkey  | Buffalo, Cat, Cattle, Dog, Donkey, Dromedary, Goat, Horse and Sheep | <i>Anaplasma</i> spp. <sup>b</sup> , <i>A. phagocytophilum</i> <sup>b</sup> , <i>A. platys</i> <sup>b</sup> , <i>Babesia</i> spp. <sup>p</sup> , <i>B. bigemina</i> <sup>p</sup> , <i>B. bovis</i> <sup>p</sup> , <i>Borrelia</i> spp. <sup>b</sup> , <i>Bo. burgdoferi</i> s.l. <sup>b</sup> , <i>Coxiella burnetii</i> <sup>b</sup> , Crimean-Congo hemorrhagic fever virus <sup>v</sup> , <i>Ehrlichia</i> spp. <sup>b</sup> , <i>E. canis</i> <sup>b</sup> , <i>E. minacensis</i> <sup>b</sup> , <i>Francisella</i> spp. <sup>b</sup> , lumpy skin disease virus <sup>v</sup> , <i>Rickettsia</i> spp. <sup>b</sup> , <i>R. aeschlimannii</i> <sup>b</sup> , <i>R. africae</i> <sup>b</sup> , <i>R. helvetica</i> <sup>b</sup> , <i>R. monacensis</i> <sup>b</sup> , <i>R. sibirica mongolotimoniae</i> <sup>b</sup> , <i>Theileria</i> spp. <sup>p</sup> , <i>Theileria annulata</i> <sup>p</sup> , <i>T. buffeli</i> <sup>p</sup> , <i>T. equi</i> <sup>p</sup>                                                                                                                                                                                                                                                                                                                                                                                                                                                                                                                                                                                                                                                                                                                                                                                                                                                                                                                                                                                                                                                                                                                                                 |



**Table S2.** TBP species reported in domestic animals or engorged ticks collected on these animals from the Mediterranean Basin.

| Categories of domestic animals | Animal names | Pathogens found in ticks ( <sup>b</sup> bacteria, <sup>p</sup> parasite, <sup>v</sup> virus)                                                                                                                                                                                                                                                                                                                                                                                                                                                                                                                                                                                                                                                                                                                                                                                                                                                                                                                                                                                                                                                                                                                                                                                                                                                                                                                                        | Pathogens found in animals ( <sup>b</sup> bacteria, <sup>p</sup> parasite, <sup>v</sup> virus)                                                                                                                                                                                                                                                                                                                                                                                                                                                                                                                                                                                                                                                                                                                                                                                                                                                                                                                                           |
|--------------------------------|--------------|-------------------------------------------------------------------------------------------------------------------------------------------------------------------------------------------------------------------------------------------------------------------------------------------------------------------------------------------------------------------------------------------------------------------------------------------------------------------------------------------------------------------------------------------------------------------------------------------------------------------------------------------------------------------------------------------------------------------------------------------------------------------------------------------------------------------------------------------------------------------------------------------------------------------------------------------------------------------------------------------------------------------------------------------------------------------------------------------------------------------------------------------------------------------------------------------------------------------------------------------------------------------------------------------------------------------------------------------------------------------------------------------------------------------------------------|------------------------------------------------------------------------------------------------------------------------------------------------------------------------------------------------------------------------------------------------------------------------------------------------------------------------------------------------------------------------------------------------------------------------------------------------------------------------------------------------------------------------------------------------------------------------------------------------------------------------------------------------------------------------------------------------------------------------------------------------------------------------------------------------------------------------------------------------------------------------------------------------------------------------------------------------------------------------------------------------------------------------------------------|
| Livestock                      | Cattle       | <i>Anaplasma</i> spp. <sup>b</sup> , <i>A. centrale</i> <sup>b</sup> , <i>A. marginale</i> <sup>b</sup> , <i>A. ovis</i> <sup>b</sup> , <i>A. platys</i> <sup>b</sup> , <i>Babesia</i> spp. <sup>p</sup> , <i>B. bigemina</i> <sup>p</sup> , <i>B. bovis</i> <sup>p</sup> , <i>B. caballi</i> <sup>p</sup> , <i>Bartonella</i> spp. <sup>b</sup> , <i>Borrelia</i> spp. <sup>b</sup> , <i>Bo. burgdoferi</i> s.l. <sup>b</sup> , <i>Chlamydia. abortus</i> <sup>b</sup> , <i>Chlamydophila psittaci</i> <sup>b</sup> , <i>Coxiella burnetii</i> <sup>b</sup> , <i>Ehrlichia</i> spp. <sup>b</sup> , <i>E. canis</i> <sup>b</sup> , <i>E. minancensis</i> <sup>b</sup> , <i>Candidatus. E. urmitei</i> <sup>b</sup> , <i>Francisella</i> spp. <sup>b</sup> , <i>Neoehrlichia mikurensis</i> <sup>b</sup> , <i>Rickettsia</i> spp. <sup>b</sup> , <i>R. aeschlimannii</i> <sup>b</sup> , <i>R. africae</i> <sup>b</sup> , <i>R. conorii</i> <sup>b</sup> , <i>R. helvetica</i> <sup>b</sup> , <i>R. massiliae</i> <sup>b</sup> , <i>R. monacensis</i> <sup>b</sup> , <i>R. raoultii</i> <sup>b</sup> , <i>R. rhipicephali</i> <sup>b</sup> , <i>R. slovaca</i> <sup>b</sup> , <i>Candidatus R. barbariae</i> <sup>b</sup> , <i>Theileria</i> spp. <sup>p</sup> , <i>T. annulata</i> <sup>p</sup> , <i>T. buffeli</i> <sup>p</sup> , <i>T. equi</i> <sup>p</sup> , <i>T. orientalis</i> <sup>p</sup> , <i>T. sergenti</i> <sup>p</sup> | <i>Anaplasma</i> spp. <sup>b</sup> , <i>A. bovis</i> <sup>b</sup> , <i>A. centrale</i> <sup>b</sup> , <i>A. marginale</i> <sup>b</sup> , <i>A. ovis</i> <sup>b</sup> , <i>A. phagocytophilum</i> <sup>b</sup> , <i>A. platys</i> <sup>b</sup> , <i>Babesia bigemina</i> <sup>p</sup> , <i>B. bovis</i> <sup>p</sup> , <i>B. divergens</i> <sup>p</sup> , <i>B. major</i> <sup>p</sup> , <i>B. occultans</i> <sup>p</sup> , <i>B. ovis</i> <sup>p</sup> , <i>Bartonella vinsonii</i> <sup>b</sup> , <i>Borrelia</i> spp. <sup>b</sup> , Crimean-Congo hemorrhagic fever virus <sup>v</sup> , <i>Coxiella burnetii</i> <sup>b</sup> , <i>Ehrlichia</i> spp. <sup>b</sup> , <i>Leptospira</i> spp. <sup>b</sup> , Lumpy skin disease virus <sup>v</sup> , <i>Rickettsia slovaca</i> <sup>b</sup> , <i>Theileria</i> spp. <sup>p</sup> , <i>T. annae</i> <sup>p</sup> , <i>T. annulata</i> <sup>p</sup> , <i>T. buffeli</i> <sup>p</sup> , <i>T. equi</i> <sup>p</sup> , <i>T. orientalis</i> <sup>p</sup> , <i>T. sergenti</i> <sup>p</sup> |
|                                | Goat         | <i>Anaplasma</i> spp. <sup>b</sup> , <i>A. ovis</i> <sup>b</sup> , <i>A. phagocytophilum</i> <sup>b</sup> , <i>A. platys</i> <sup>b</sup> , <i>Babesia bovis</i> <sup>p</sup> , <i>B. microti</i> <sup>p</sup> , <i>B. ovis</i> <sup>p</sup> , <i>B. vogeli</i> <sup>p</sup> , <i>Bartonella</i> spp. <sup>b</sup> , <i>Borrelia</i> spp. <sup>b</sup> , <i>Chlamydia abortus</i> <sup>b</sup> , <i>Chlamydophila psittaci</i> <sup>b</sup> , Crimean-Congo hemorrhagic fever virus <sup>v</sup> , <i>Coxiella burnetii</i> <sup>b</sup> , <i>Ehrlichia canis</i> <sup>b</sup> , <i>E. minancensis</i> <sup>b</sup> , <i>Candidatus E. urmitei</i> <sup>b</sup> , <i>Rickettsia</i> spp. <sup>b</sup> , <i>R. aeschlimannii</i> <sup>b</sup> , <i>R. africae</i> <sup>b</sup> , <i>R. conorii</i> <sup>b</sup> , <i>R. conorii israelensis</i> <sup>b</sup> , <i>R. massiliae</i> <sup>b</sup> , <i>R. monacensis</i> <sup>b</sup> , <i>R. rhipicephali</i> <sup>b</sup> , <i>R. sibirica mongolotimonae</i> <sup>b</sup> , <i>Candidatus R. goldwassenii</i> <sup>b</sup> , <i>Candidatus R. barbariae</i> <sup>b</sup> , <i>Theileria buffeli</i> <sup>p</sup> , <i>T. ovis</i> <sup>p</sup> , Tick-borne encephalitis virus <sup>v</sup>                                                                                                                                                                                         | <i>Anaplasma</i> spp. <sup>b</sup> , <i>A. bovis</i> <sup>b</sup> , <i>A. centrale</i> <sup>b</sup> , <i>A. marginale</i> <sup>b</sup> , <i>A. ovis</i> <sup>b</sup> , <i>A. phagocytophilum</i> <sup>b</sup> , <i>Babesia</i> spp., <i>Bartonella vinsonii</i> <sup>b</sup> , <i>Borrelia theileri</i> <sup>b</sup> , Crimean-Congo hemorrhagic fever virus <sup>v</sup> , <i>Coxiella burnetii</i> <sup>b</sup> , <i>Ehrlichia</i> spp. <sup>b</sup> , <i>Mycoplasma</i> spp. <sup>b</sup> , <i>Rickettsia slovaca</i> <sup>b</sup> , <i>Theileria</i> spp. <sup>p</sup> , <i>T. annulata</i> <sup>p</sup> , <i>T. luwenshuni</i> <sup>p</sup> , <i>T. ovis</i> <sup>p</sup> , <i>T. uilenberg</i> <sup>p</sup> , Tick-borne encephalitis virus <sup>v</sup>                                                                                                                                                                                                                                                                           |
|                                | Sheep        | <i>Anaplasma</i> spp. <sup>b</sup> , <i>A. ovis</i> <sup>b</sup> , <i>A. phagocytophilum</i> <sup>b</sup> , <i>A. platys</i> <sup>b</sup> , <i>Babesia bigemina</i> <sup>p</sup> , <i>B. bovis</i> <sup>p</sup> , <i>B. microti</i> <sup>p</sup> , <i>B. ovis</i> <sup>p</sup> , <i>B. vogeli</i> <sup>p</sup> , <i>Borrelia</i> spp. <sup>b</sup> , <i>Chlamydia abortus</i> <sup>b</sup> , <i>Chlamydophila psittaci</i> <sup>b</sup> ,                                                                                                                                                                                                                                                                                                                                                                                                                                                                                                                                                                                                                                                                                                                                                                                                                                                                                                                                                                                           | <i>Anaplasma</i> spp. <sup>b</sup> , <i>A. bovis</i> <sup>b</sup> , <i>A. marginale</i> <sup>b</sup> , <i>A. ovis</i> <sup>b</sup> , <i>A. phagocytophilum</i> <sup>b</sup> , <i>Babesia</i> spp. <sup>p</sup> , <i>B. bigemina</i> <sup>p</sup> , <i>B. motasi</i> <sup>p</sup> , <i>B. ovis</i> <sup>p</sup> , <i>Borrelia theileri</i> <sup>b</sup> , Crimean-Congo hemorrhagic                                                                                                                                                                                                                                                                                                                                                                                                                                                                                                                                                                                                                                                       |

|           |                                                                                                                                                                                                                                                                                                                                                                                                                                                                                                                                                                                                                                                                                    |                                                                                                                                                                                                                                                                                                                                                                                                                                                                                                                                                                                                                                                                                                                                                                                                                                                                                                                                                                                                                                                                                                                                                                                                                                                                                                                                                                                                                               |
|-----------|------------------------------------------------------------------------------------------------------------------------------------------------------------------------------------------------------------------------------------------------------------------------------------------------------------------------------------------------------------------------------------------------------------------------------------------------------------------------------------------------------------------------------------------------------------------------------------------------------------------------------------------------------------------------------------|-------------------------------------------------------------------------------------------------------------------------------------------------------------------------------------------------------------------------------------------------------------------------------------------------------------------------------------------------------------------------------------------------------------------------------------------------------------------------------------------------------------------------------------------------------------------------------------------------------------------------------------------------------------------------------------------------------------------------------------------------------------------------------------------------------------------------------------------------------------------------------------------------------------------------------------------------------------------------------------------------------------------------------------------------------------------------------------------------------------------------------------------------------------------------------------------------------------------------------------------------------------------------------------------------------------------------------------------------------------------------------------------------------------------------------|
|           | Crimean-Congo hemorrhagic fever virus <sup>v</sup> , <i>Coxiella burnetii</i> <sup>b</sup> , <i>Ehrlichia</i> spp. <sup>b</sup> , <i>E. canis</i> <sup>b</sup> , <i>Candidatus E. urmitei</i> <sup>b</sup> , <i>Rickettsia</i> spp. <sup>b</sup> , <i>R. africae</i> <sup>b</sup> , <i>R. conorii</i> <sup>b</sup> , <i>R. felis</i> <sup>b</sup> , <i>R. hoogstraalii</i> <sup>b</sup> , <i>R. massiliae</i> <sup>b</sup> , <i>R. sibirica mongolotimonae</i> <sup>b</sup> , <i>R. slovaca</i> <sup>b</sup> , <i>Candidatus R. goldwassenii</i> <sup>b</sup> , <i>Candidatus R. barbariae</i> <sup>b</sup> , <i>Theileria annulata</i> <sup>p</sup> , <i>T. ovis</i> <sup>p</sup> | fever virus <sup>v</sup> , <i>Coxiella burnetii</i> <sup>b</sup> , <i>Ehrlichia</i> spp. <sup>b</sup> , <i>Leptospira</i> spp. <sup>b</sup> , <i>Mycoplasma</i> spp. <sup>b</sup> , <i>Rickettsia slovaca</i> <sup>b</sup> , <i>Theileria</i> spp. <sup>p</sup> , <i>T. annulata</i> <sup>p</sup> , <i>T. lestoquardi</i> <sup>p</sup> , <i>T. luwenshuni</i> <sup>p</sup> , <i>T. ovis</i> <sup>p</sup> , <i>T. uilenbergi</i> <sup>p</sup>                                                                                                                                                                                                                                                                                                                                                                                                                                                                                                                                                                                                                                                                                                                                                                                                                                                                                                                                                                                  |
| Dromedary | <i>Anaplasma</i> spp. <sup>b</sup> , <i>A. platys</i> <sup>b</sup> , Crimean-Congo hemorrhagic fever virus <sup>v</sup> , <i>Coxiella burnetii</i> <sup>b</sup> , <i>Rickettsia</i> spp. <sup>b</sup> , <i>R. aeschlimannii</i> <sup>b</sup> , <i>R. africae</i> <sup>b</sup> , <i>R. helvetica</i> <sup>b</sup> , <i>R. monacensis</i> <sup>b</sup> , <i>Theileria</i> spp. <sup>p</sup> , <i>T. annulata</i> <sup>p</sup>                                                                                                                                                                                                                                                        | <i>Anaplasma</i> spp. <sup>b</sup> , <i>A. platys</i> <sup>b</sup> , <i>Coxiella burnetii</i> <sup>b</sup> , <i>Leptospira</i> spp. <sup>b</sup> , <i>Rickettsia aeschlimannii</i> <sup>b</sup> , <i>R. massiliae</i> <sup>b</sup> , <i>R. africae</i> <sup>b</sup> , <i>R. helvetica</i> <sup>b</sup> , <i>R. monacensis</i> <sup>b</sup> , <i>Theileria annulata</i> <sup>p</sup>                                                                                                                                                                                                                                                                                                                                                                                                                                                                                                                                                                                                                                                                                                                                                                                                                                                                                                                                                                                                                                           |
| Horse     | <i>Anaplasma</i> spp. <sup>b</sup> , <i>A. ovis</i> <sup>b</sup> , <i>A. phagocytophilum</i> <sup>b</sup> , <i>A. platys</i> <sup>b</sup> , <i>Borrelia</i> spp. <sup>b</sup> , <i>Candidatus Ehrlichia urmitei</i> <sup>b</sup> , <i>Rickettsia</i> spp. <sup>b</sup> , <i>R. massiliae</i> <sup>b</sup> , <i>Candidatus R. goldwassenii</i> <sup>b</sup> , <i>Candidatus R. barbariae</i> <sup>b</sup> , <i>Theileri equi</i> <sup>p</sup>                                                                                                                                                                                                                                       | <i>Anaplasma</i> spp. <sup>b</sup> , <i>A. marginale</i> <sup>b</sup> , <i>A. ovis</i> <sup>b</sup> , <i>A. phagocytophilum</i> <sup>b</sup> , <i>Babesia caballi</i> <sup>p</sup> , <i>B. equi</i> , <i>Borrelia burgdoferi</i> s.l. <sup>b</sup> , <i>Coxiella burnetii</i> <sup>b</sup> , <i>Ehrlichia equi</i> <sup>b</sup> , <i>Rickettsia</i> spp. <sup>b</sup> , <i>R. aechlimannii</i> <sup>b</sup> , <i>Theileria annae</i> <sup>p</sup> , <i>T. buffeli</i> <sup>p</sup> , <i>T. equi</i> <sup>p</sup> , <i>T. sergenti</i> <sup>p</sup>                                                                                                                                                                                                                                                                                                                                                                                                                                                                                                                                                                                                                                                                                                                                                                                                                                                                            |
| Buffalo   | Crimean-Congo hemorrhagic fever virus <sup>v</sup> , <i>Ehrlichia</i> spp. <sup>b</sup> , <i>E. canis</i> <sup>b</sup>                                                                                                                                                                                                                                                                                                                                                                                                                                                                                                                                                             | <i>Anaplasma marginale</i> <sup>b</sup> , <i>A. platys</i> <sup>b</sup> , <i>Babesia bovis</i> <sup>p</sup> , Crimean-Congo hemorrhagic fever virus <sup>v</sup> , <i>Coxiella burnetii</i> <sup>b</sup> , <i>Leptospira</i> spp. <sup>b</sup> , <i>Theileria annulata</i> <sup>p</sup> , <i>T. lestoquardi</i> <sup>p</sup> , <i>T. orientalis</i> <sup>p</sup> , <i>T. ovis</i> , <i>T. uilenbergi</i> <sup>p</sup>                                                                                                                                                                                                                                                                                                                                                                                                                                                                                                                                                                                                                                                                                                                                                                                                                                                                                                                                                                                                         |
| Chicken   | <i>Anaplasma</i> spp. <sup>b</sup> , <i>Borrelia</i> spp. <sup>b</sup> , <i>Rickettsia</i> spp. <sup>b</sup>                                                                                                                                                                                                                                                                                                                                                                                                                                                                                                                                                                       | -                                                                                                                                                                                                                                                                                                                                                                                                                                                                                                                                                                                                                                                                                                                                                                                                                                                                                                                                                                                                                                                                                                                                                                                                                                                                                                                                                                                                                             |
| Donkey    | <i>Rickettsia</i> spp. <sup>b</sup> , <i>R. africae</i> <sup>b</sup> , <i>R. conorii</i> <sup>b</sup> , <i>R. slovaca</i> <sup>b</sup> , <i>Theileria</i> spp. <sup>p</sup> , <i>T. annae</i> <sup>p</sup> , <i>T. annulata</i> <sup>p</sup> , <i>T. equi</i> <sup>p</sup>                                                                                                                                                                                                                                                                                                                                                                                                         | <i>Anaplasma</i> spp. <sup>b</sup> , <i>A. marginale</i> <sup>b</sup> , <i>A. phagocytophilum</i> <sup>b</sup> , <i>Babesia</i> spp. <sup>p</sup> , <i>B. caballi</i> <sup>p</sup>                                                                                                                                                                                                                                                                                                                                                                                                                                                                                                                                                                                                                                                                                                                                                                                                                                                                                                                                                                                                                                                                                                                                                                                                                                            |
| Pig       |                                                                                                                                                                                                                                                                                                                                                                                                                                                                                                                                                                                                                                                                                    | <i>Babesia</i> spp. <sup>p</sup> , <i>Theileria</i> spp. <sup>p</sup>                                                                                                                                                                                                                                                                                                                                                                                                                                                                                                                                                                                                                                                                                                                                                                                                                                                                                                                                                                                                                                                                                                                                                                                                                                                                                                                                                         |
| Pet       | Dog                                                                                                                                                                                                                                                                                                                                                                                                                                                                                                                                                                                                                                                                                | <i>Anaplasma</i> spp. <sup>b</sup> , <i>A. centrale</i> <sup>b</sup> , <i>A. marginale</i> <sup>b</sup> , <i>A. ovis</i> <sup>b</sup> , <i>A. phagocytophilum</i> <sup>b</sup> , <i>A. platys</i> <sup>b</sup> , <i>Babesia bigemina</i> <sup>p</sup> , <i>B. canis</i> <sup>p</sup> , <i>B. capreoli</i> <sup>p</sup> , <i>B. divergens</i> <sup>p</sup> , <i>B. gibsoni</i> <sup>p</sup> , <i>B. microti</i> <sup>p</sup> , <i>B. ovis</i> <sup>p</sup> , <i>B. venatorum</i> <sup>p</sup> , <i>B. vogeli</i> <sup>p</sup> , <i>Bartonella</i> spp. <sup>b</sup> , <i>Ba. henselae</i> <sup>b</sup> , <i>Ba. vinsonii berkhoffi</i> <sup>b</sup> , <i>Borrelia</i> spp. <sup>b</sup> , <i>Bo. afzelii</i> <sup>b</sup> , <i>Bo. bugdoferi</i> s.l. <sup>b</sup> , <i>Anaplasma</i> spp. <sup>b</sup> , <i>A. marginale</i> <sup>b</sup> , <i>A. ovis</i> <sup>b</sup> , <i>A. phagocytophilum</i> <sup>b</sup> , <i>A. platys</i> <sup>b</sup> , <i>Babesia</i> spp. <sup>p</sup> , <i>B. caballi</i> <sup>p</sup> , <i>B. canis</i> <sup>p</sup> , <i>B. gibsoni</i> <sup>p</sup> , <i>B. microti</i> <sup>p</sup> , <i>B. vogeli</i> <sup>p</sup> , <i>Bartonella</i> spp. <sup>b</sup> , <i>Ba. henselae</i> <sup>b</sup> , <i>Ba. vinsonii</i> <sup>b</sup> , <i>Ba. vinsonii berkhoffi</i> <sup>b</sup> , <i>Borrelia bugdoferi</i> s.l. <sup>b</sup> , <i>Cercopithifilaria baina</i> <sup>p</sup> , <i>Ehrlichia</i> |

|        |                                                                                                                                                                                                                                                                                                                                                                                                                                                                                                                                                                                                                                                                                                                                                                                                                                                                                                                                                                                                                                                                               |                                                                                                                                                                                                                                                                                                                                                                                                                                                                                                                                                                                                                                                                                                                                                 |
|--------|-------------------------------------------------------------------------------------------------------------------------------------------------------------------------------------------------------------------------------------------------------------------------------------------------------------------------------------------------------------------------------------------------------------------------------------------------------------------------------------------------------------------------------------------------------------------------------------------------------------------------------------------------------------------------------------------------------------------------------------------------------------------------------------------------------------------------------------------------------------------------------------------------------------------------------------------------------------------------------------------------------------------------------------------------------------------------------|-------------------------------------------------------------------------------------------------------------------------------------------------------------------------------------------------------------------------------------------------------------------------------------------------------------------------------------------------------------------------------------------------------------------------------------------------------------------------------------------------------------------------------------------------------------------------------------------------------------------------------------------------------------------------------------------------------------------------------------------------|
|        | <p><i>Bo. garinii</i><sup>b</sup>, <i>Bo. valaisiana</i><sup>b</sup>, <i>Cercopithifilaria baina</i><sup>p</sup>, Crimean-Congo hemorrhagic fever virus<sup>v</sup>, <i>Chlamydia abortus</i><sup>b</sup>, <i>Chlamydophila psittaci</i><sup>b</sup>, <i>Coxiella burnetii</i><sup>b</sup>, <i>Ehrlichia</i> spp.<sup>b</sup>, <i>E. canis</i><sup>b</sup>, <i>Hepatozoon</i> spp.<sup>p</sup>, <i>H. canis</i><sup>p</sup>, <i>H. felis</i><sup>p</sup>, <i>Rickettsia</i> spp.<sup>b</sup>, <i>R. conorii</i><sup>b</sup>, <i>R. conorii israelensis</i><sup>b</sup>, <i>R. felis</i><sup>b</sup>, <i>R. hoogstraalii</i><sup>b</sup>, <i>R. massiliae</i><sup>b</sup>, <i>R. monacensis</i><sup>b</sup>, <i>R. raoultii</i><sup>b</sup>, <i>R. rhipicephali</i><sup>b</sup>, <i>R. slovaca</i><sup>b</sup>, <i>Candidatus R. goldwassenii</i><sup>b</sup>, <i>Candidatus R. barbariae</i><sup>b</sup>, <i>Theileria annae</i><sup>p</sup>, <i>T. buffeli</i><sup>p</sup>, <i>T. equi</i><sup>p</sup>, <i>T. orientalis</i><sup>p</sup>, <i>T. sergenti</i><sup>p</sup></p> | <p>spp.<sup>b</sup>, <i>E. canis</i><sup>b</sup>, <i>E. ewingii</i><sup>b</sup>, <i>Hepatozoon</i> spp.<sup>p</sup>, <i>H. canis</i><sup>p</sup>, <i>Mycoplasma haemocanis</i><sup>b</sup>, <i>Candidatus M. haematoparvum</i><sup>b</sup>, <i>Rickettsia</i> spp.<sup>b</sup>, <i>R. conorii</i><sup>b</sup>, <i>R. massiliae</i><sup>b</sup>, <i>R. rickettsia</i><sup>b</sup>, <i>Theileria</i> spp.<sup>p</sup>, <i>T. annae</i><sup>p</sup>, <i>T. cervi</i><sup>p</sup>, <i>T. equi</i><sup>p</sup></p>                                                                                                                                                                                                                                   |
| Cat    | <p><i>Anaplasma phagocytophilum</i><sup>b</sup>, <i>Babesia vogeli</i><sup>p</sup>, <i>Bartonella henselae</i><sup>b</sup>, <i>Chlamydia abortus</i><sup>b</sup>, <i>Chlamydophila psittaci</i><sup>b</sup>, <i>Ehrlichia canis</i><sup>b</sup>, <i>Rickettsia</i> spp.<sup>b</sup>, <i>R. felis</i><sup>b</sup>, <i>R. helvetica</i><sup>b</sup>, <i>R. monacensis</i><sup>b</sup>, <i>Theileria buffeli</i><sup>p</sup></p>                                                                                                                                                                                                                                                                                                                                                                                                                                                                                                                                                                                                                                                 | <p><i>Anaplasma</i> spp.<sup>b</sup>, <i>A. marginale</i><sup>b</sup>, <i>A. phagocytophilum</i><sup>b</sup>, <i>Babesia microti</i><sup>p</sup>, <i>Bartonella</i> spp.<sup>b</sup>, <i>Ba. clarridgeiae</i><sup>b</sup>, <i>Ba. henselae</i><sup>b</sup>, <i>Coxiella burnettii</i><sup>b</sup>, <i>Ehrlichia canis</i><sup>b</sup>, <i>Hepatozoon</i> spp.<sup>p</sup>, <i>H. canis</i><sup>p</sup>, <i>H. felis</i><sup>p</sup>, <i>Mycoplasma haemofelis</i><sup>b</sup>, <i>Candidatus M. haemonotum</i><sup>b</sup>, <i>Candidatus M. turicensis</i><sup>b</sup>, <i>Rickettsia</i> spp.<sup>b</sup>, <i>R. conorii</i><sup>b</sup>, <i>R. massiliae</i><sup>b</sup>, <i>R. typhi</i><sup>b</sup>, <i>Theileria</i> spp.<sup>p</sup></p> |
| Rabbit | <p><i>Coxiella burnetii</i><sup>b</sup></p>                                                                                                                                                                                                                                                                                                                                                                                                                                                                                                                                                                                                                                                                                                                                                                                                                                                                                                                                                                                                                                   |                                                                                                                                                                                                                                                                                                                                                                                                                                                                                                                                                                                                                                                                                                                                                 |
